# Supplementary material
Source: PubMed Central journal article supplement (PMC1695483)
Supplement: iai_74_11_6487__2.pdf [file iai_74_11_6487__2.pdf]

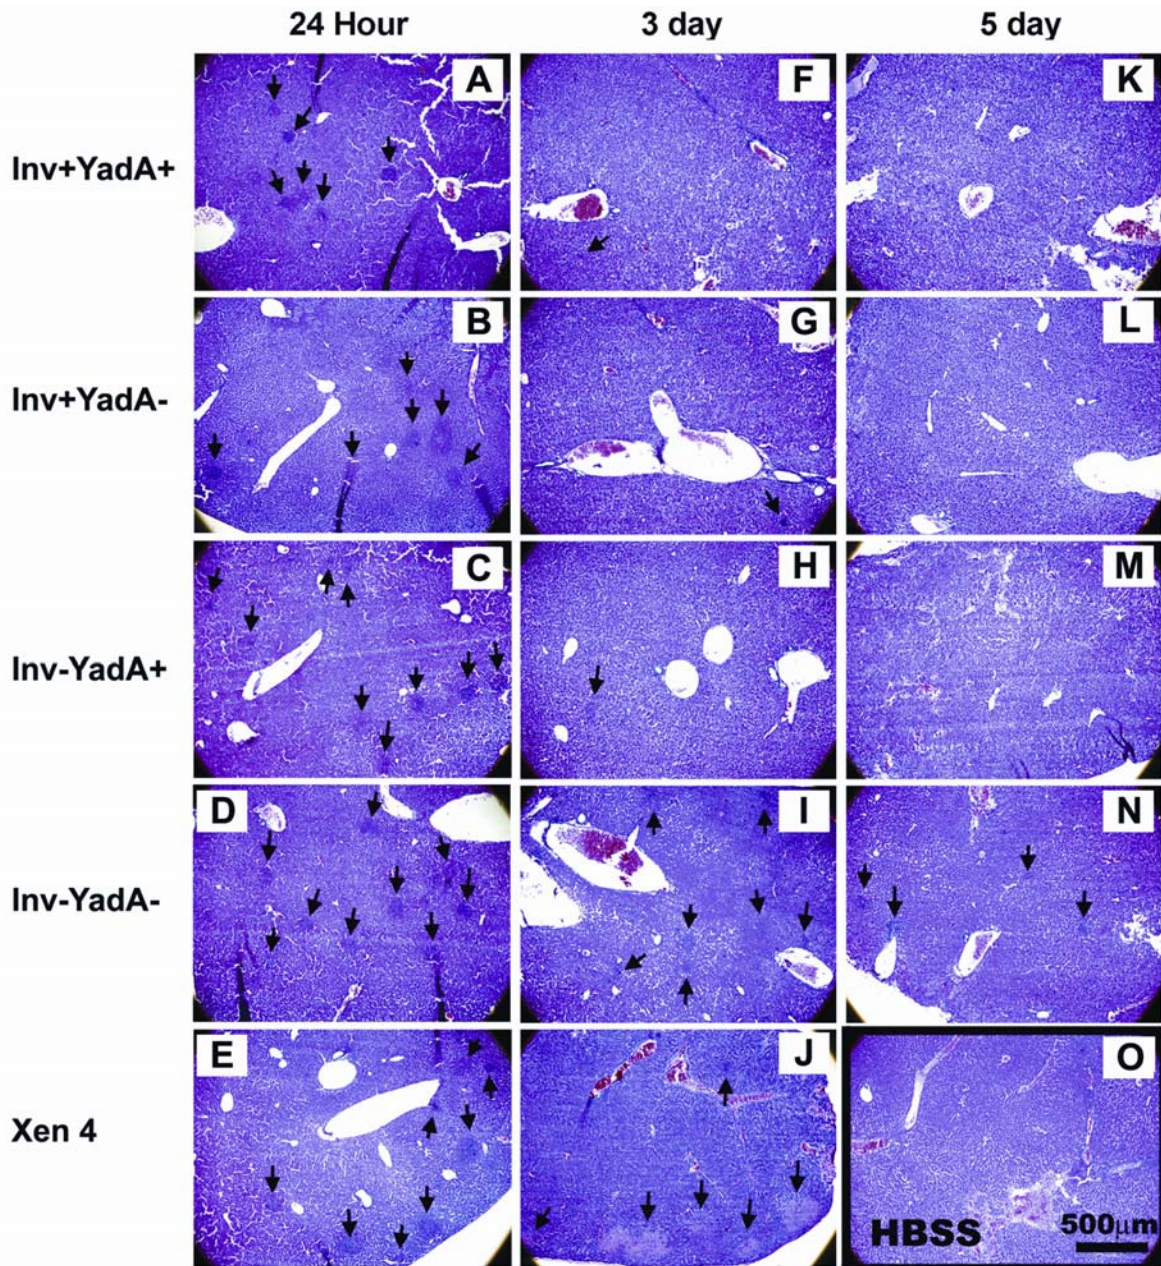

**FIG. S3. Liver pathology, low magnification.** Liver sections (5 $\mu$ m) from control (HBSS) and infected mice were stained with H & E. Representative images (40x) of control liver tissue from mice injected with HBSS (panel O) or livers infected by the designated strains of *Y. pseudotuberculosis* (panels A-N) are shown. Arrows indicate the presence of microabscesses (panels A-E, G-I, N) and/or necrotic lesions (panel J). All experiments were repeated 3 times; data shown are from one representative experiment.
