# Supplementary material
Source: PubMed Central journal article supplement (PMC1695483)
Supplement: iai_74_11_6487__3.pdf [file iai_74_11_6487__3.pdf]

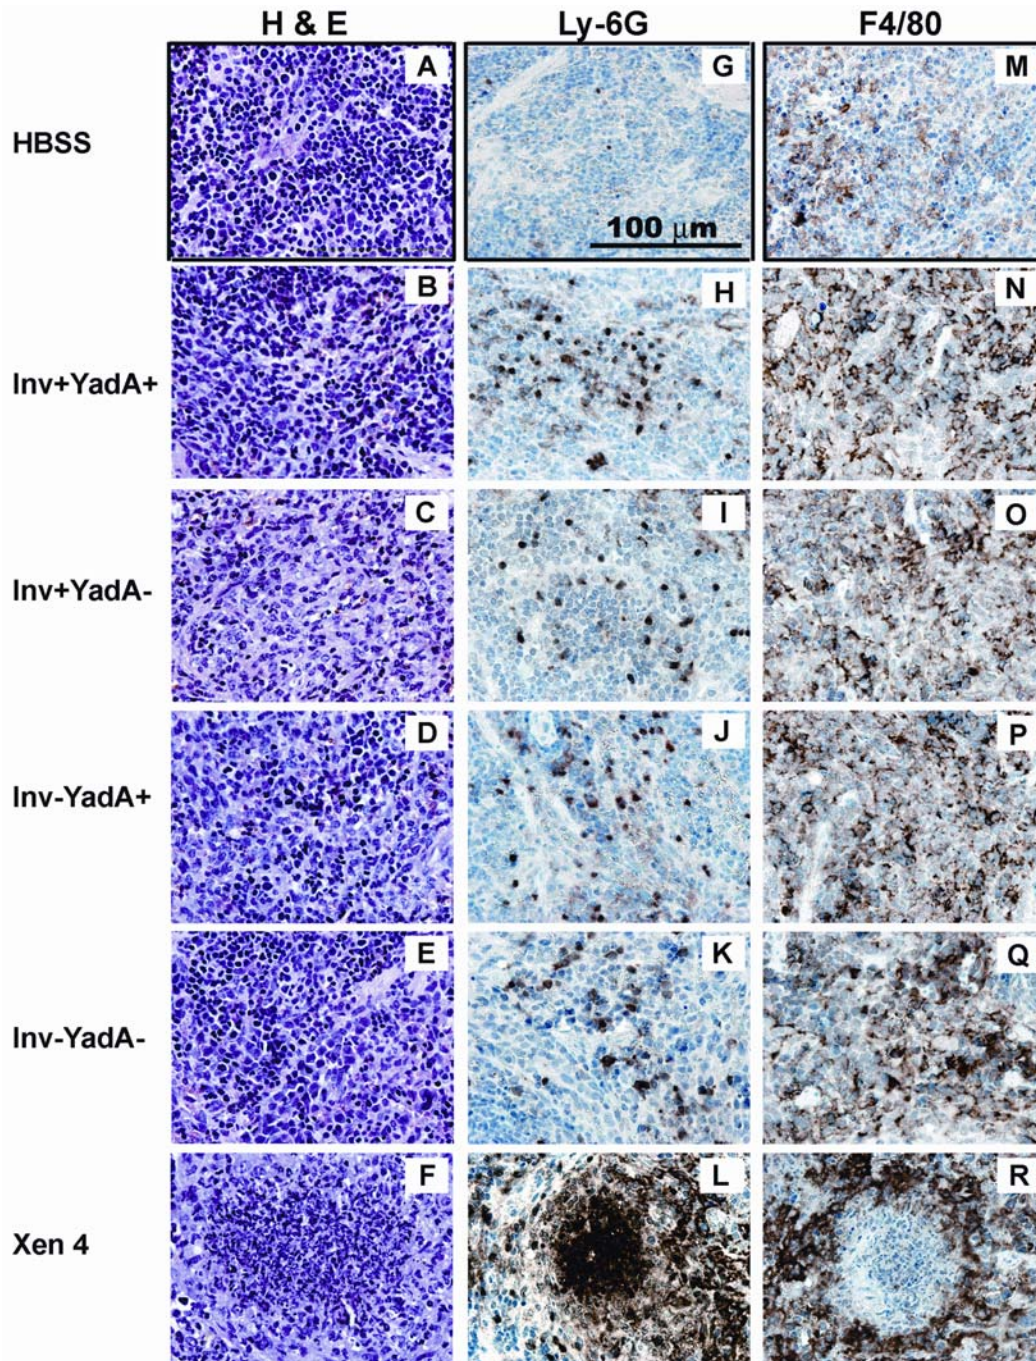

**Fig. S2. Histopathology and phagocyte recruitment in the spleen.** Sections (5 $\mu$ m) from spleens that were infected for 72 hours were stained with H & E (panels A-F) or processed for IHC with neutrophil-specific (LY-6G; panels G-L) or macrophage-specific (F4/80; panels M-R) antibodies. All experiments were repeated 3 times. Representative images (400x) of control spleen tissue (panels A, G, M) or spleens from animals infected with the designated *Y. pseudotuberculosis* strains are shown.
